# Supplementary material for: NMR, DFT and luminescence studies of the complexation of Al(iii) with 8-hydroxyquinoline-5-sulfonate
Source: Royal Society of Chemistry journal article supplement (doi:10.1039/c2dt31381b), 2012-01-01
Supplement: c2dt31381b.pdf [file c2dt31381b.pdf]

## Supporting information

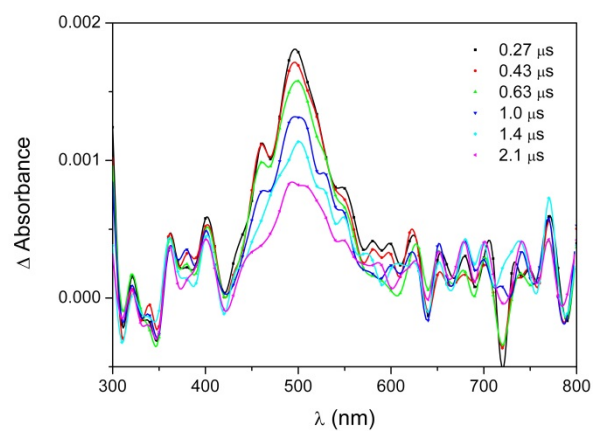

**Figure S1.** Triplet-singlet difference absorption spectra observed with different delays following laser excitation at 355 nm of a solution of the 1:3 Al(III)/8-HQS complex at pH 4.
